# Supplementary material
Source: Springer Nature journal article supplement (https://www.springermedizin.de/resource/supplementary/12888_2010_831_MOESM2_ESM.pdf/9478930)

Study nameStatistics for each studyStd diff in means and 95% CI

|                   | <b>Std diff<br/>in means</b> | <b>Standard<br/>error</b> | <b>Lower<br/>limit</b> | <b>Upper<br/>limit</b> | <b>Z-Value</b> | <b>p-Value</b> |
|-------------------|------------------------------|---------------------------|------------------------|------------------------|----------------|----------------|
| Du(2007)          | 0.648                        | 0.265                     | 0.129                  | 1.167                  | 2.446          | 0.014          |
| Hu & Gui (2007)   | 0.768                        | 0.293                     | 0.193                  | 1.342                  | 2.620          | 0.009          |
| Kong & Li(2004)   | 1.290                        | 0.275                     | 0.751                  | 1.830                  | 4.688          | 0.000          |
| Li (2007)         | 1.246                        | 0.303                     | 0.652                  | 1.841                  | 4.109          | 0.000          |
| Li et al.(2007)   | 0.848                        | 0.233                     | 0.390                  | 1.305                  | 3.632          | 0.000          |
| Liu et al. (2000) | 0.180                        | 0.253                     | -0.315                 | 0.675                  | 0.713          | 0.476          |
| Meng (2007)       | 0.579                        | 0.255                     | 0.079                  | 1.079                  | 2.269          | 0.023          |
| Qu (2002)         | 0.592                        | 0.273                     | 0.057                  | 1.127                  | 2.167          | 0.030          |
| Shu & Dong(2008)  | 0.767                        | 0.328                     | 0.125                  | 1.409                  | 2.341          | 0.019          |
| Xie & Jiang(2005) | 0.764                        | 0.258                     | 0.259                  | 1.269                  | 2.964          | 0.003          |
| Zhou et al.(2008) | 1.282                        | 0.220                     | 0.852                  | 1.713                  | 5.839          | 0.000          |
| Zhu et al.(2007)  | 0.579                        | 0.259                     | 0.071                  | 1.088                  | 2.235          | 0.025          |
|                   | 0.795                        | 0.100                     | 0.599                  | 0.990                  | 7.972          | 0.000          |

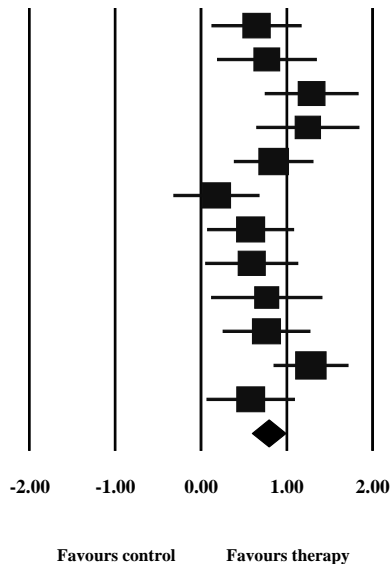

Supplement: MOESM2 [file 9478930]
